# Supplementary material for: Molecularly tuned peptide assemblies at the liquid–solid interface studied by scanning tunneling microscopy
Source: Royal Society of Chemistry journal article supplement (doi:10.1039/b923927h), 2010-01-01
Supplement: b923927h.pdf [file b923927h.pdf]

**Figure S1.**

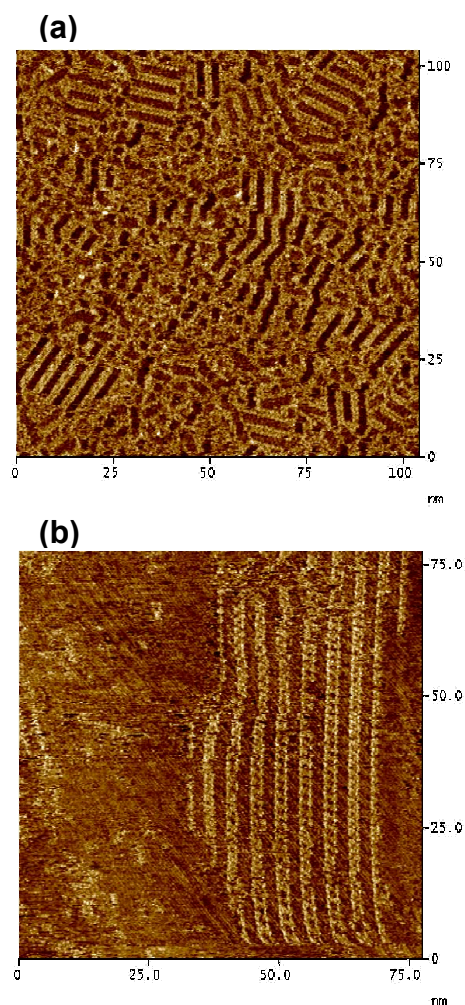

**Fig. S1** Large area STM images of (a) QCG/BT-O-C16 assembly (104.1 nm × 104.1 nm,  $V = 675.0$  mV,  $I = 473.0$  pA) and (b) (DAKA)<sub>4</sub>/BT-O-C16 assembly on HOPG surface (77.5 nm × 77.5 nm,  $V = 699.8$  mV,  $I = 537.0$  pA).

After the introduction of tripeptide QCG into the assembly system, no QCG/BT-O-C16 co-assembly can be observed. The ladder-like assembly of BT-O-C16 is retained with smaller domain areas for the mixed system, while QCG self-assembly could not be observed in the present conditions which may be ascribed to the higher mobility of the shorter peptides. Phase separation is observed for (DAKA)<sub>4</sub>/BT-O-C16 mixture showing the typical lamella structures for hexadecapeptide (DAKA)<sub>4</sub> and ladder-like structural domains for BT-O-C16 molecules. The observation of the entrapped pentapeptide other than tri- and hexadeca- peptides in the BT-O-C16 network confirms the length selectivity of the peptides in the peptide/BT-O-C16 complex.
